# Supplementary material
Source: PubMed Central journal article supplement (PMC8810680)
Supplement: NIHMS1747948-supplement-SI.pdf [file NIHMS1747948-supplement-SI.pdf]

1 **Supplementary Data Table 1. Mass spectrometric identification of GltAB as the interaction**  
 2 **partner of GudB.** Top hits in the proteomics analysis of the eluates from the immunoprecipitation  
 3 of GudB from *B. subtilis* cell lysate grown in glucose-ammonia and in histidine, and in the presence  
 4 and absence of the crosslinker DSG. Both GltA and GltB are highly represented in the glucose-  
 5 ammonia sample compared to histidine, both in untreated cells and in cells treated with crosslinker  
 6 (-/+ DSG; the results are shown in this order, e.g., 103 identified peptides without DSG and 124  
 7 identified peptides with DSG).  
 8

|                  | Protein ID | Protein     | # of peptides [-/+ DSG] | Ratio Glucose: Histidine [/+ DSG] | Sequence coverage [%] [/+ DSG] | Mol. weight [kDa] |
|------------------|------------|-------------|-------------------------|-----------------------------------|--------------------------------|-------------------|
| Glucose -Ammonia | P39812     | <b>GltA</b> | 103/124                 | 21.69/167.61                      | 73.6/85                        | <b>168.77</b>     |
|                  | P50735     | GudB        | 30/42                   | 0.56/0.37                         | 78/79.6                        | 47.34             |
|                  | O34399     | <b>GltB</b> | 27/36                   | 15.86/94.28                       | 61.3/73.6                      | <b>54.862</b>     |
| Histidine        | P50735     | GudB        | 30/42                   | 0.56/0.37                         | 78/79.6                        | 47.34             |
|                  | P28598     | GroL        | 41/38                   | 0.11/0.31                         | 84.9/77.2                      | 57.424            |
|                  | P28599     | GroS        | 9/13                    | 0.18/0.99                         | 68.1/89.4                      | 10.176            |

9  
 10  
 11  
 12  
 13  
 14  
 15  
 16  
 17  
 18  
 19  
 20  
 21  
 22  
 23

24 **Supplementary Data Table 2:** Steady state kinetic parameters of GudB, GltAB and the GudB-GltAB  
 25 complex. Reactions were initiated by the addition of enzyme (5 µg of recombinant GudB, or 2.5 µg  
 26 of the GudB-GltAB complex) and their progress was monitored by absorbance at 340 nm. The  
 27 concentration of the fixed substrates were 4 mM of NAD<sup>+</sup> for the dehydrogenase reaction, and 2  
 28 mM AKG, 5 mM glutamine, and 200 µM NADPH, for the glutamate synthase reaction. The reactions  
 29 were carried out in 50 mM HEPES pH 7.9 at 25 °C. H is the Hills coefficient (measured for  
 30 standalone GudB, and also for the GudB-GltAB complex, with glutamate as substrate). \* The K<sub>M</sub>  
 31 values for GudB and GudB<sub>complex</sub> were derived from fitting the data to an allosteric sigmoidal model.  
 32 All data are presented as mean ± S.D of two independent measurements.

33

| Enzyme/<br>Varied substrate                                             | K <sub>M</sub>                               | H           | k <sub>cat</sub><br>(s <sup>-1</sup> ) | k <sub>cat</sub> / K <sub>M</sub><br>(mM <sup>-1</sup> s <sup>-1</sup> ) |
|-------------------------------------------------------------------------|----------------------------------------------|-------------|----------------------------------------|--------------------------------------------------------------------------|
| <b>GudB</b><br>Glutamate                                                | 7.3 ± 0.7 mM*                                | 0.59 ± 0.06 | 9.8                                    | 1.34                                                                     |
| <b>GudB<sub>complex</sub></b><br>Glutamate                              | 138 ± 33 mM*                                 | 1.3 ± 0.07  | 11                                     | 0.08                                                                     |
| <b>GltAB</b><br>Glutamine<br>NADPH<br>α-ketoglutarate                   | 76.6 ± 6.7 µM<br>21 ± 2.5 µM<br>4.6 ± 0.6 µM |             | 65 ± 1.2<br>72 ± 2.3<br>61.5 ± 1.7     | 855<br>3428<br>13369                                                     |
| <b>GltAB<sub>complex</sub></b><br>Glutamine<br>NADPH<br>α-ketoglutarate | 65.2 ± 7.7 µM<br>10 ± 1.7 µM<br>3.5 ± 0.4 µM |             | 80.6 ± 2.3<br>90 ± 1.9<br>80.6 ± 1.8   | 1236<br>9000<br>23028                                                    |

34

35

36

37 **Supplementary Data Table 3.** List of metabolites identified using LC-MS analysis from the GudB-  
 38 GltAB complex directly isolated from *B. subtilis*.

39

| Metabolite          | Mass<br>(in Da) | Retention<br>time (min) | Intensity                |
|---------------------|-----------------|-------------------------|--------------------------|
| Aspartate           | 132.0302        | 7.86/8.28               | 2.5 x 10 <sup>5</sup>    |
| Glutamate           | 146.0459        | 32/7.89                 | 1 x 10 <sup>5</sup>      |
| Unknown             | 101.0244        | 8.79                    | 4.5 x 10 <sup>5</sup>    |
| Valine              | 116.0717        | 5.53                    | 1.84x<br>10 <sup>4</sup> |
| α-Ketoglutaric acid | 145.0143        | 8.81                    | 3 x 10 <sup>6</sup>      |

|                     |          |       |                       |
|---------------------|----------|-------|-----------------------|
| Citrate             | 191.0197 | 10.46 | 1.8 x 10 <sup>5</sup> |
| Succinate           | 117.0193 | 8.60  | 1 x 10 <sup>5</sup>   |
| Fumarate            | 115.0037 | 9.24  | 5.5 x 10 <sup>4</sup> |
| Malate              | 133.0143 | 9.24  | 1.7 x 10 <sup>6</sup> |
| Phosphoenolpyruvate | 166.9751 | 10.44 | 3 x 10 <sup>5</sup>   |
| Arginine            | 173.10   | 13.72 | 1.5 x 10 <sup>4</sup> |

40

41

42 **Supplementary Data Table 4.** List of potential interactions between GltA and GudB. Noted are the

43 PDB codes and chain identifiers for which the residue number relate. # Residues that are different

44 between RocG and GudB. \* Residues on the “minor” GudB subunit that interacts less extensively

with GltA. H-bond, hydrogen bond; SB, salt bridge.

| RocG<br>(3k92A)   | GudB<br>7MFMA,*7MFMB | GltA<br>(7MFMG) | Bond type                | Distance<br>(Å) |
|-------------------|----------------------|-----------------|--------------------------|-----------------|
| R124              | R124                 | K573            | H-bond                   | 2.94            |
| N231              | N231                 | N447            | H-bond                   | 2.77            |
| D270              | D270                 | K330            | SB                       | 3.06            |
| R272              | R272                 | Q445            | H-bond                   | 2.41            |
| D273              | D273                 | Y560            | H-bond                   | 3.34            |
| S274              | S274                 | K558            | H-bond                   | 3.30            |
| N280 <sup>#</sup> | <b>K280</b>          | K708,E324       | H-bond, SB               | 3.01,3.08       |
| R84               | R84                  | E451            | SB                       | 3.45            |
| H86               | H86                  | E454            | SB                       | 3.66            |
| K271 <sup>#</sup> | <b>R271</b>          | E324            | SB                       | 3.00            |
| H398 <sup>#</sup> | <b>*R398</b>         | E551,<br>S550   | SB,                      | 3.66            |
| K399 <sup>#</sup> | <b>*R399</b>         | Y433            | H-<br>bond/Cation-<br>Pi | 2.97            |
| R419              | <b>*R419</b>         | D579            | SB                       | 2.56            |

45

46

47

48 **Supplementary Table 5: Cryo-EM data collection, processing, and model refinement**  
 49 **statistics**

|                                                     | <b>GudB<sub>6</sub>-GltA<sub>2</sub>B<sub>2</sub></b><br>(EMDB-EMD23817)<br>(PDB 7MFM) | <b>GudB<sub>6</sub>-GltA<sub>6</sub>B<sub>6</sub></b><br>(EMDB-23825)<br>(PDB 7MFT) |
|-----------------------------------------------------|----------------------------------------------------------------------------------------|-------------------------------------------------------------------------------------|
| <b>Data collection and processing</b>               |                                                                                        |                                                                                     |
| Magnification                                       | 105,000 X                                                                              | 105,000 X                                                                           |
| Voltage (kV)                                        | 300 kV                                                                                 | 300 kV                                                                              |
| Electron exposure (e <sup>-</sup> /Å <sup>2</sup> ) | 61                                                                                     | 47.7                                                                                |
| Defocus range (μm)                                  | 0.3-2.8                                                                                | 0.3-2.3                                                                             |
| Pixel size (Å)                                      | 0.824                                                                                  | 0.824                                                                               |
| Symmetry imposed                                    | C2                                                                                     | D3                                                                                  |
| Initial particle images (no.)                       | 1353359                                                                                | 60487                                                                               |
| Final particle images (no.)                         | 718672                                                                                 | 11878                                                                               |
| Map resolution (Å)                                  | 2.42                                                                                   | 3.9                                                                                 |
| FSC threshold                                       | 0.143                                                                                  | 0.143                                                                               |
| Map resolution range (Å)                            | 2.4-3.6                                                                                | 3.0-7.5                                                                             |
| <b>Refinement</b>                                   |                                                                                        |                                                                                     |
| Initial model used (PDB code)                       | 1OFD, 6S6T, 3K8Z                                                                       | GudB1-GltA1B1 (7MFM)                                                                |
| Model resolution (Å)                                | 2.5                                                                                    | 3.9                                                                                 |
| FSC threshold                                       | 0.143                                                                                  | 0.143                                                                               |
| Model resolution range (Å)                          | 2.4-3.6                                                                                | 3.0-7.5                                                                             |
| Map sharpening <i>B</i> factor (Å <sup>2</sup> )    | 0.0                                                                                    | 0.0                                                                                 |
| Model composition                                   |                                                                                        |                                                                                     |
| Non-hydrogen atoms                                  | 50242                                                                                  | 18733                                                                               |
| Protein residues                                    | 6406                                                                                   | 2383                                                                                |
| Ligands                                             | 10                                                                                     | 79.80                                                                               |
| <i>B</i> factors (Å <sup>2</sup> )                  |                                                                                        |                                                                                     |
| Protein                                             | 94.00                                                                                  | 97.77                                                                               |
| Ligand                                              | 106.93                                                                                 | 79.80                                                                               |
| R.m.s. deviations                                   |                                                                                        |                                                                                     |
| Bond lengths (Å)                                    | 0.003 (0)                                                                              | 0.003 (0)                                                                           |
| Bond angles (°)                                     | 0.534                                                                                  | 0.559                                                                               |
| Validation                                          |                                                                                        |                                                                                     |
| MolProbity score                                    | 1.88                                                                                   | 1.76                                                                                |
| Clashscore                                          | 5.17                                                                                   | 6.82                                                                                |
| Poor rotamers (%)                                   | 2.10                                                                                   | 0.00                                                                                |
| Ramachandran plot                                   |                                                                                        |                                                                                     |
| Favored (%)                                         | 94.79                                                                                  | 94.36                                                                               |
| Allowed (%)                                         | 5.12                                                                                   | 5.60                                                                                |
| Disallowed (%)                                      | 0.09                                                                                   | 0.04                                                                                |

50

51

52

53

54

55

56

57 **Supplementary Table 6. *B. subtilis* strains used in the study**

| Strain name                                 | Genotype                                                                           | Description                                                                                                                                                                                                                                                                                                                              |
|---------------------------------------------|------------------------------------------------------------------------------------|------------------------------------------------------------------------------------------------------------------------------------------------------------------------------------------------------------------------------------------------------------------------------------------------------------------------------------------|
| 3610                                        | Prototroph                                                                         | Wild-type <i>Bacillus subtilis</i>                                                                                                                                                                                                                                                                                                       |
| <i>gltB</i> -TS                             | 3610 <i>gltB::gltB-TS</i>                                                          | GltB, under its native promoter, tagged with a twinstrep (TS)-at its C-terminus. Used for pulldown of GltB and of the GudB-GltAB complex for kinetic studies.                                                                                                                                                                            |
| <i>gltB</i> -TS- $P_{gudB}^-$ - <i>rocG</i> | 3610 <i>gltB::gltB-TS rocG::kan amyE::(P<sub>gudB</sub><sup>-</sup>-rocG-spec)</i> | As above, plus RocG placed under GudB's promoter (at the <i>amyE</i> landing site). Endogenous <i>rocG</i> is knocked out with a kanamycin cassette. Used for testing the in vivo interaction capability of RocG with GltAB                                                                                                              |
| $\Delta$ <i>gudB</i>                        | 3610 <i>gudB::erm</i>                                                              | Knockout of <i>gudB</i> . Used for growth profiling in media containing different C/N source                                                                                                                                                                                                                                             |
| $\Delta$ <i>gltA</i>                        | 3610 <i>gltA::erm</i>                                                              | Knockout of <i>gltA</i> . Used for growth profiling in media containing different C/N source                                                                                                                                                                                                                                             |
| $\Delta$ <i>gltB</i>                        | 3610 <i>gltB::erm</i>                                                              | Knockout of <i>gltB</i> . Used for growth profiling in media containing different C/N source                                                                                                                                                                                                                                             |
| $\Delta$ <i>gltABC</i>                      | 3610 <i>gltABC::erm</i>                                                            | A knockout of the entire <i>gltABC</i> operon. Used for the generation of all the following strains.                                                                                                                                                                                                                                     |
| $P_{hs}$ - <i>gltAB</i> <sup>C1A</sup>      | 3610 <i>gltABC::(P<sub>hs</sub><sup>-</sup>-gltA<sup>C1A</sup>-gltB-TS-cat)</i>    | Strain expressing the inactive mutant of GltA (GltA <sup>C1A</sup> ) along with a GltB-TS from an IPTG inducible hyper spank promoter ( $P_{hs}$ ). GudB is expressed from its endogenous promoter ( $P_{gudB}$ ). Used for planktonic and biofilm growth phenotyping and for the purification of the GudB-GltAB <sup>C1A</sup> complex. |

|                                                    |                                                                                                                |                                                                                                                                                                                                                                                                                                                                                                                                                                           |
|----------------------------------------------------|----------------------------------------------------------------------------------------------------------------|-------------------------------------------------------------------------------------------------------------------------------------------------------------------------------------------------------------------------------------------------------------------------------------------------------------------------------------------------------------------------------------------------------------------------------------------|
| $P_{hs^-}$<br>$gltAB^{C1A} + P_{gudB^-}$<br>$rocG$ | 3610 $gltABC ::$<br>$(P_{hs^-}gltA^{C1A}-gltB-$<br>$TS-cat) rocG::kan$<br>$amyE ::$<br>$(P_{gudB^-}rocG-spec)$ | Strain expressing the inactive mutant of GltA (GltA <sup>C1A</sup> ) along with a GltB-TS from $P_{hs^-}$ . The strain also constitutively expresses RocG using $P_{gudB^-}$ from <i>amyE</i> locus. Used for planktonic and biofilm growth phenotyping and for the purification of the GudB-GltAB <sup>C1A</sup> complex. The strain was also used to test the <i>in vivo</i> interaction capability of RocG with GltAB <sup>C1A</sup> . |
| $P_{hs^-}gltAB$                                    | 3610 $gltABC ::$<br>$(P_{hs^-}gltA-gltB-TS)$                                                                   | Strain expressing GltA along with a GltB-TS from $P_{hs^-}$ . Used for overexpression and purification of functional GudB-GltAB complex for structural studies. The strain was also used for planktonic and biofilm growth phenotyping.                                                                                                                                                                                                   |
| $P_{hs^-}gltAB + P_{gudB^-}$<br>$rocG$             | 3610 $gltABC ::$<br>$(P_{hs^-}gltA-gltB-TS)$<br>$rocG::kan amyE ::$<br>$(P_{gudB^-}rocG-spec)$                 | Strain expressing GltA along with a GltB-TS from $P_{hs^-}$ . The strain also constitutively expresses RocG using $P_{gudB^-}$ from the <i>amyE</i> locus. The strain was also used for planktonic and biofilm growth phenotyping.                                                                                                                                                                                                        |
| $P_{hs^-}gltAB -$<br>$\Delta gudB$                 | 3610 $gltABC ::$<br>$(P_{hs^-}gltA-gltB-TS)$<br>$gudB::erm$                                                    | Strain expressing GltA along with GltB-TS from $P_{hs^-}$ but devoid of GudB. For overexpression and purification of GltAB without co-purification of GudB.                                                                                                                                                                                                                                                                               |

58

59

60 **Supplementary Table 7. Oligonucleotides used in the study**

61 Each row of the table provides the name of the construct, the fragments used to generate the  
62 construct and oligonucleotide sequence used to generate the respective fragment. 5HR and 3HR  
63 corresponds to the 5' and 3' homology arms for the recombination.

| Fragments             | Sequence (5'-3')                                                                                                                                    |
|-----------------------|-----------------------------------------------------------------------------------------------------------------------------------------------------|
| <b><i>gltB-TS</i></b> |                                                                                                                                                     |
| a. <i>colE1-ampR</i>  | 5' atccggtaaagtgcactggagtcttagcaaatTTTTattag 3'<br>5' agaactcaggtacatctgacactccttattgattttgaag 3'                                                   |
| b. 5HR                | 5' ctcaaaaaatcaataaggagtgtcaagaaatgtctgaaacgcactcgtataaaaaagtctttcc3'<br>5' tgccctggtctcatccacaatttgagaataaataaaggggattatcatataagagaaaccggctgctgc3' |
| c. <i>gltB-TS</i>     | 5' gataatcccctttatttctcaaatgtggatgagaccaggcagaacctcccgatccacctccggaacctccacctt<br>ttcgaattggatgactccaggaaccggagaactgaactccccatcaaatatcg3'           |
| d. 3HR                | 5' gtagtacgtaaggaaggggagaggaaacatggggaaaccaactggattatggagatcaaacg3'                                                                                 |

|                                                                                                 |                                                                                                                                                                                                                                                                                                                                                                                                                                                                                                                                                     |
|-------------------------------------------------------------------------------------------------|-----------------------------------------------------------------------------------------------------------------------------------------------------------------------------------------------------------------------------------------------------------------------------------------------------------------------------------------------------------------------------------------------------------------------------------------------------------------------------------------------------------------------------------------------------|
|                                                                                                 | <p>5' ctccataaatccagttggttccccatgttctctccccttctactgtactaccgc3'<br/> 5' ctaataaaaaatttgctaaagaactccagctactgagggcgctgtaaagtgatgtccaagatgggaattcaactg<br/> tgc3'</p>                                                                                                                                                                                                                                                                                                                                                                                   |
| <p><b><i>ΔgltA</i></b><br/> a. <i>colE1-ampR</i><br/> b. 5HR<br/> c. Erm<br/> d. 3HR</p>        | <p>5' tattaattgatggggtgctggagttcttagcaaatttttattagctgaacttag3'<br/> 5' atgggccggttgaacacgtcttgacactccttatttgattttgaagacttactcg3'<br/> 5' aataaggagtcaagacgttcaaccggccatatacaaaagcgccatcaactt3'<br/> 5' tgccagagtaaaggatcggaaggggagaggaacatggggaaccaactggattatg3'<br/> 5' tgtcctctcccctccgatccttaactctggcaaccctcaaaatgaatgagacatg3'<br/> 5' atcgggggagaggaatttggttaagccgactgcgcaaaagacataatcgattcaca3'<br/> 5' cgcagtcggctaaaccaaatcctctccccgatcaatttcgataataccggtcataaaatc3'<br/> 5' ttgctaaagaactccagcaaccccatcaattaatattgctggtccttgcggcataa3'</p> |
| <p><b><i>ΔgltABC</i></b><br/> a. 5HR<br/> b. Erm<br/> c. 3HR</p>                                | <p>5' cgaacgcaaagccggagacatcattaatat3'<br/> 5' cagagtaaaggatcaaaaaatgaacccgagcttctatatagaagc3'<br/> 5' tcgggtcatttttgatccttaactctggcaaccctcaaaatg3'<br/> 5' gataatccccttattggttaagccgactgcgcaaaagacataa3'<br/> 5' agtcggctaaaccaataaaggggattatcatataagagaaccg3'<br/> 5' tgcaaatgctgaaaatccttgatcatttaac3'</p>                                                                                                                                                                                                                                       |
| <p><b><i>ΔgltB</i></b><br/> a. <i>colE1-ampR</i><br/> b. 5HR<br/> c. <i>erm</i><br/> d. 3HR</p> | <p>5' atccggtaaagtgcactggagttcttagcaaatttttattag3'<br/> 5' agaatctcaggtacatcttgacactccttatttgattttgaag3'<br/> 5' taaggagtcaagatgtacctgagattctgggaggtcctcgga3'<br/> 5' cagagtaaaggatcataaaggggattatcatataagagaaccggtctggc3'<br/> 5' gataatccccttattgatccttaactctggcaaccctcaaaatg3'<br/> 5' gaaggggagaggaactggttaagccgactgcgcaaaagacataa3'<br/> 5' agtcggctaaaccagttcctctccccttctactgtactaccgc3'<br/> 5' gctaaagaactccagtcactttaccggatcagccggccaagct3'</p>                                                                                            |
| <p><b><i>ΔgudB</i></b><br/> a. <i>ampR</i><br/> b. 5HR<br/> c. <i>erm</i><br/> d. 3HR</p>       | <p>5' catcaggctcgtactggagttcttagcaaatttttattag3'<br/> 5' aaaatcggaacaatcttgacactccttatttgattttgaag3'<br/> 5' ggagtgcaagattgtccgatttatcatgaagctgatccac3'<br/> 5' gaggtaaaggatcgtgatgatttcataaaaaataaaaaatctcctatgataaaatag3'<br/> 5' caaatcatcaacgatccttaactctggcaaccctcaaaatg3'<br/> 5' aggttaactcaatggttaagccgactgcgcaaaagacataa3'<br/> 5' tcggctaaaccattgagttaacctcctagaatcctgttctcacatgctccc3'</p>                                                                                                                                               |

|                                                  |                                                                                                                                                       |
|--------------------------------------------------|-------------------------------------------------------------------------------------------------------------------------------------------------------|
|                                                  | 5' aaagaactccagtagcagcctgatgacggaaacctcccgtgc3'                                                                                                       |
| <b><i>P<sub>hs</sub>-gltAB</i></b>               |                                                                                                                                                       |
| a. 5HR                                           | 5' aataaggagtgtaagacgaacgcaaagccggagacatcattaatattcatctacagcgggcaaaa3'<br>5' gtagtctcacatttacctgaaagtacttttctgaaacaacacctcgtttactgtgaaaattccaattgag3' |
| b. <i>P<sub>hs</sub></i>                         | 5' cagcaaaagtactttcagggtaaatgtgagcactcacaattcatttgcaaaagttgtgactttat3'<br>5' atttgattgacgtcatgtttgtcctcttattagtaatcagctagctgtcgactaagcttaattg3'       |
| c. <i>gltAB-TS</i>                               | 5' ctaataaggaggacaacatgacgtacaatcaaagccaaaagctcaaggctctaccgctcctgaatt3'<br>5' attagctgcatgcaaaaccggtttctctatatgataatccccttatttctcaaattggatgagac3'     |
| d. <i>lacI</i>                                   | 5' catataagagaaaccggtttgcatgaagctaattcgggtgaaacgaggtcatcatttctccgaaaaaac3'<br>5' tatgataatcccctttattggatttcttacgcgaaatacgggcagacatggcctgccggttattat3' |
| e. 3HR                                           | 5' tcgctgaaggaaatccaataaaggggattatcatataagagaaaccggtctggctgccagccggttt3'<br>5' ttgctaaagaactccagtgcaaatgctgaaatccttgatcattttaaccttcaataacgatgtccg3'   |
| f. <i>colE1</i>                                  | 5' ggatttccagcattgcactggagttcttagcaaatTTTTtattagctgaacttagtattagtggc3'<br>5' tctccggcttgcgttcgtcttgacactccttattgatttttgaagacttactcggagtcaaaaa3'       |
| <b><i>P<sub>hs</sub>-gltAB<sup>C1A</sup></i></b> |                                                                                                                                                       |
| a. 5HR                                           | 5' tttcgtctcaagaacgaacgcaaagccggagacatcattaatattcatctaca3'<br>5' tgctcacatttacctgaaagtacttttctgaaacaacacctcgttttactgtg3'                              |
| b. <i>P<sub>hs</sub>-gltAB-TS</i>                | 5' gcaaaagtactttcagggtaaatgtgagcactcacaattcatttgcaaaagttg3'                                                                                           |
| c. <i>cat</i>                                    | 5' cattatgtactattttattctcaaattggtgatgagaccaggcagaacctcccg3'                                                                                           |
| d. <i>lacI</i>                                   | 5' acaattgagaataaaaaatagtacataatggatttcttacgcgaaatacgggcagacatgg3'<br>5' tagcttgcataaaactccctatgcgactcctgcattaggaagcagcccagtag3'                      |
| e. 3HR- <i>colE1</i>                             | 5' agtcgcataaggagttgcatgaagctaattcgggtgaaacgaggtcatcatttcc3'<br>5' gataatccccttattggatttcttacgcgaaatacgggcagacatggcctgcc3'                            |
|                                                  | 5' gcgtaaggaaatccaataaaggggattatcatataagagaaaccggtctggctgc3'<br>5' ccggcttgcgttcgttctgaagacgaaagggcctcgtgatacgcctatttta3'                             |

64

65

66
